# Supplementary material for: Integrative Systems Biology Approaches to Identify Potential Biomarkers and Pathways of Cervical Cancer
Source: Preprints.org preprint supplement (doi:10.20944/preprints202103.0197.v1), 2021-03-05
Supplement: Supplementary file 1 [file Figure S1.docx]

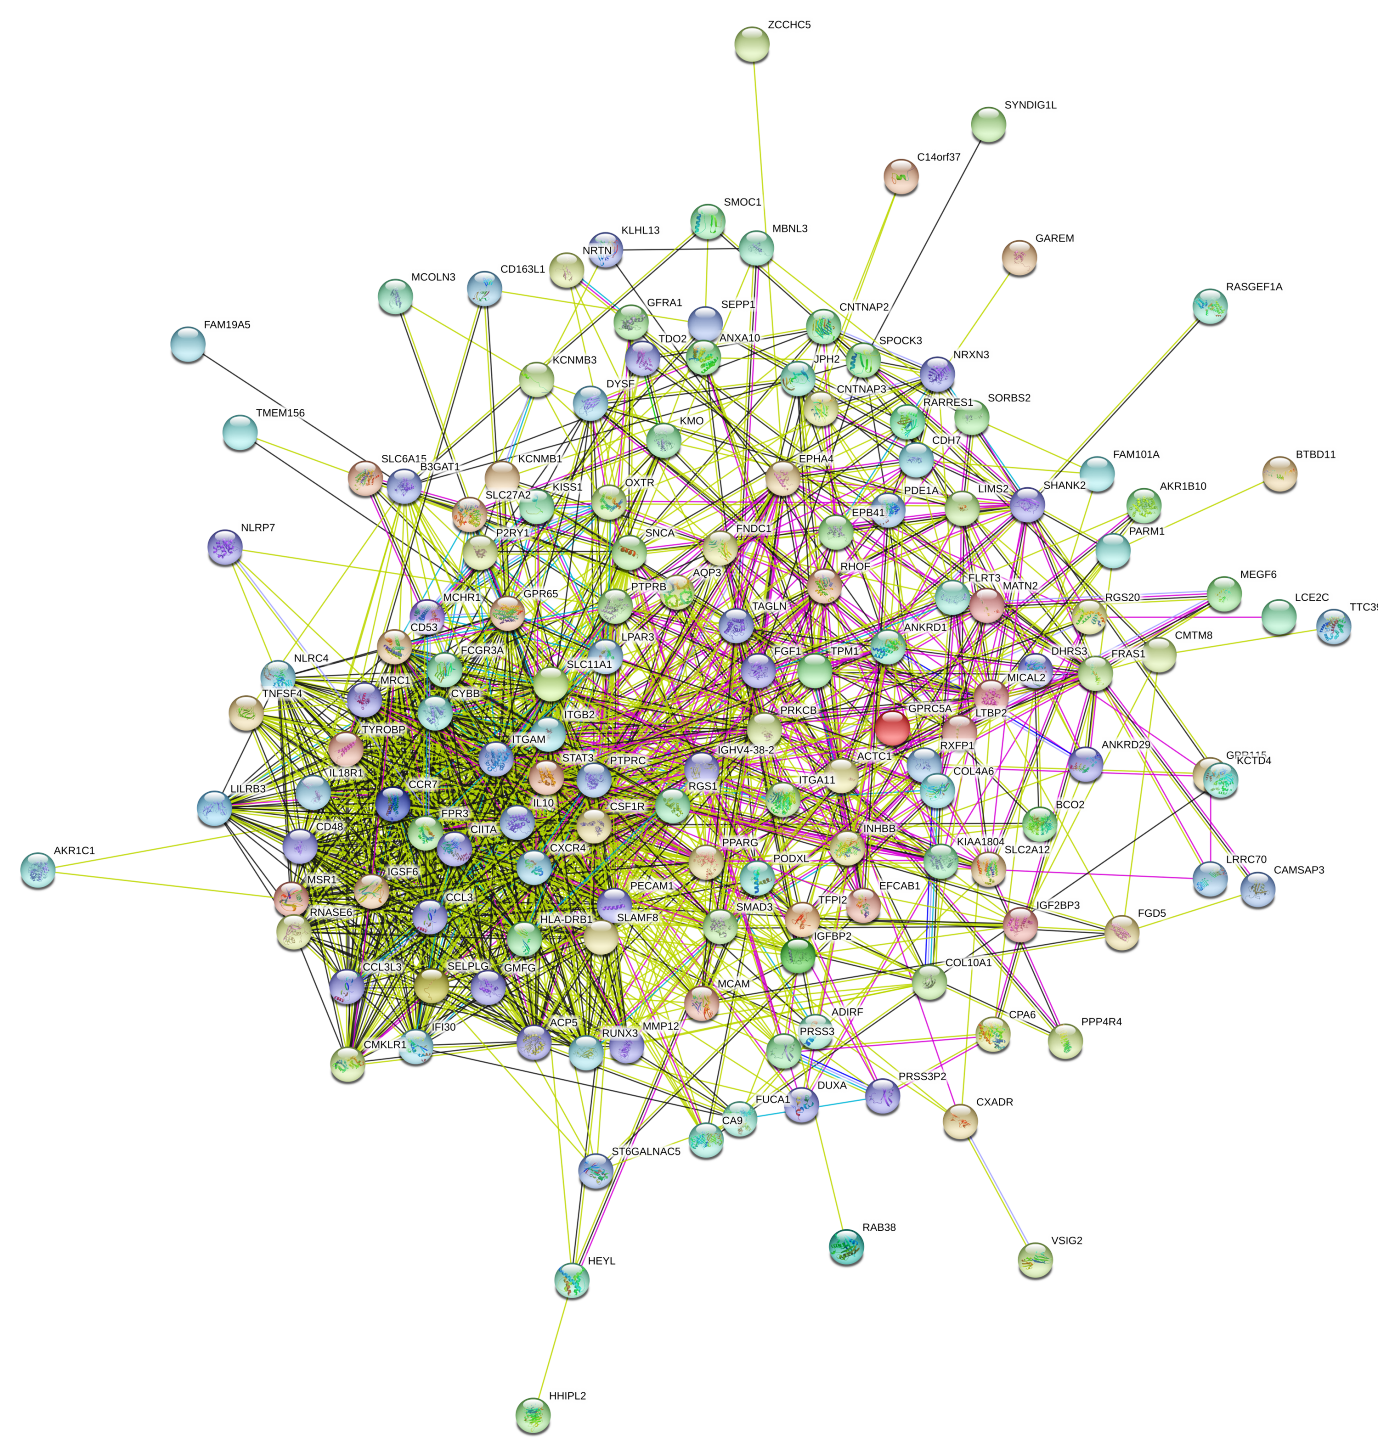


**Figure S1**: All differentially expressed genes in PPI network as a merged illustration. This PPI network had 1206 edges for 151 nodes.
